# Supplementary material for: How Does RIRS Impact on Stent-Related Symptoms? Insights from a Prospective Observational Study by EAU-YAU Endourology and Urolithiasis Working Group
Source: Research Square preprint supplement (doi:10.21203/rs.3.rs-7152265/v1), 2025-07-31
Supplement: Supplementary file 1 [file ec7f921d05547e39de69e545.docx]

**Table 1. Baseline patient characteristics**

|  | Patient n=57 |
| --- | --- |
| Age, median (IQR) | 47 (39 – 53) |
| Gender, n (%)  *Male*  *Female* | 30 (53%)  27 (47%) |
| Height (cm), median (IQR) | 175 (161 - 179) |
| BMI, median (IQR) | 25.8 (22.9 – 28.3) |
| Stone size (mm), median (IQR) | 18 (16-22) |
| Stone location, n (%)  *Renal pelvis*  *Upper calyx*  *Middle calyx*  *Lower calyx*  *Multiple stones* | 25 (44%)  8 (14%)  6 (11%)  11 (19%)  7 (12%) |
| Position of the tip of the DJ stent, n (%)  *Renal pelvis*  *Upper calyx*  *Middle calyx*  *Lower calyx* | 38 (67%)  19 (33%)  0 (0%)  0 (0%) |
| Distal end crossing the middle, n (%)  *No*  *Yes* | 29 (51%)  28 (49%) |
| Presence of any symptom of any severity, n (%)  Prior RIRS  Post-RIRS 1st day  Post RIRS 7th day | 52 (91.2%)  57 (100)  51 (89.5) |
| Presence of any severe symptom, n (%)  Prior RIRS  Post-RIRS 1st day  Post RIRS 7th day | 39 (68.4)  51 (89.5)  34 (59.6) |
